# Supplementary material
Source: Research Square preprint supplement (doi:10.21203/rs.3.rs-10040258/v1)
Supplement: Supplementary file 1 [file 3040a4690d35c472e4829047.docx]

# Appendix

**Table A1:** Variance Inflation Factors (VIF), Main Regression Variables

| **Variable** | **VIF (raw/pooled)** | **VIF (within FE)** | **Interpretation** |
| --- | --- | --- | --- |
| fiscal (FP % GDP) | 22.14 | 1.82 | High raw VIF reflects between-country GDP correlation; no concern in the FE estimator |
| resource (NR % GDP) | 34.08 | 2.14 | Between-country resource endowment; absorbed by country FE |
| lnsukuk (log sukuk) | 24.12 | 1.98 | Malaysia/Indonesia concentration; FE demeaning resolves collinearity |
| lnbank (log IF assets) | 152.84 | 2.31 | Very high raw; within-country VIF well below threshold |
| iq (WGI composite) | 41.24 | 1.64 | IQ-income co-movement; orthogonalised by FD-GMM first-differencing |
| lngdp (log GDP pc) | 90.12 | 2.06 | Income-level correlation absorbed by country FE |
| CO2 (CO₂ per capita) | 3.02 | 3.02 | No concern at any level |
| energy (net energy) | 1.68 | 1.68 | No concern |
| lnpop (log population) | 4.64 | 1.61 | No concern |

**Table A2:** D-8 Country Classification, IF Regulatory Tier and Mean Key Variables

| **Country** | **IF Reg. Framework** | **Income tier** | **Mean ANS** | **Mean Fiscal** | **Mean Resource** | **Mean Sukuk (US$m)** | **Mean IF bank (US$bn)** | **Green sukuk programme** |
| --- | --- | --- | --- | --- | --- | --- | --- | --- |
| **Tier 1 — Established IF Regulatory Framework with Dedicated Green Sukuk Standards** | | | | | | | | |
| Malaysia | Established (T1) | Higher | 0.43 | 24.4 | 8.6 | 152.4 | 224.8 | SRI Sukuk Framework 2017 |
| Indonesia | Established (T1) | Higher | 0.24 | 16.6 | 9.4 | 13.2 | 88.6 | Green Sukuk since 2018 |
| **Tier 2 — Partial Framework; IF Under General Securities Law** | | | | | | | | |
| Turkey | Partial (T2) | Higher | 0.29 | 32.8 | 1.1 | 3.1 | 68.4 | No dedicated green IF standard |
| Pakistan | Partial (T2) | Lower | 0.07 | 19.6 | 0.5 | 6.4 | 34.2 | Draft Green Sukuk Rules (2022) |
| Bangladesh | Partial (T2) | Lower | 0.19 | 14.4 | 0.7 | 2.3 | 19.8 | No formal programme |
| **Tier 3 — Nascent Framework; Limited IF Market Depth and Minimal Green IF Activity** | | | | | | | | |
| Egypt | Nascent (T3) | Lower | 0.10 | 28.8 | 5.2 | 2.1 | 13.4 | No programme |
| Nigeria | Nascent (T3) | Lower | −0.13 | 11.9 | 43.2 | 0.5 | 5.1 | No programme |
| Iran | Nascent (T3) | Lower | −0.09 | 16.9 | 39.1 | 0.9 | 8.6 | No programme (sanctions) |

**Table A3:** FD-GMM Specification Tests and Robustness Summary

| **Test** | **Model specification** | **Statistic/result** | **Interpretation** |
| --- | --- | --- | --- |
| **FD-GMM Validity Tests (Table 8, Full Sample)** | | | |
| Sargan test | Over-identifying restrictions | p = 0.68 | Do not reject H₀ → instruments valid |
| Arellano-Bond AR(1) | First-order autocorrelation | p < 0.05 | Expected in FD-GMM → no concern |
| Arellano-Bond AR(2) | Second-order autocorrelation | p = 0.21 | Do not reject H₀ → FD-GMM consistent |
| Wald chi²(7) | Joint significance of regressors | 31.84, p < 0.001 | Regressors jointly significant |
| **Robustness Checks** | | | |
| System-GMM | Alternative GMM estimator | Signs/magnitudes stable | Robust to estimator choice |
| +Controls (GDP, CO₂, energy, pop) | Extended specification | Core coefficients sign-stable | Not driven by omitted controls |
| Green TFP (alt. DV) | Alternative GG measure | Qualitatively consistent | Not dependent on ANS |
| GGGI (alt. DV) | Second alternative DV | Qualitatively consistent | Replicated across DV choices |
